# Supplementary material
Source: MDPI journal article supplement (https://www.mdpi.com/1999-4907/9/10/629)
Supplement: s1 [file s1]

# Supplementary: Influences of Extreme Weather Conditions on the Carbon Cycles of Bamboo and Tea Ecosystems

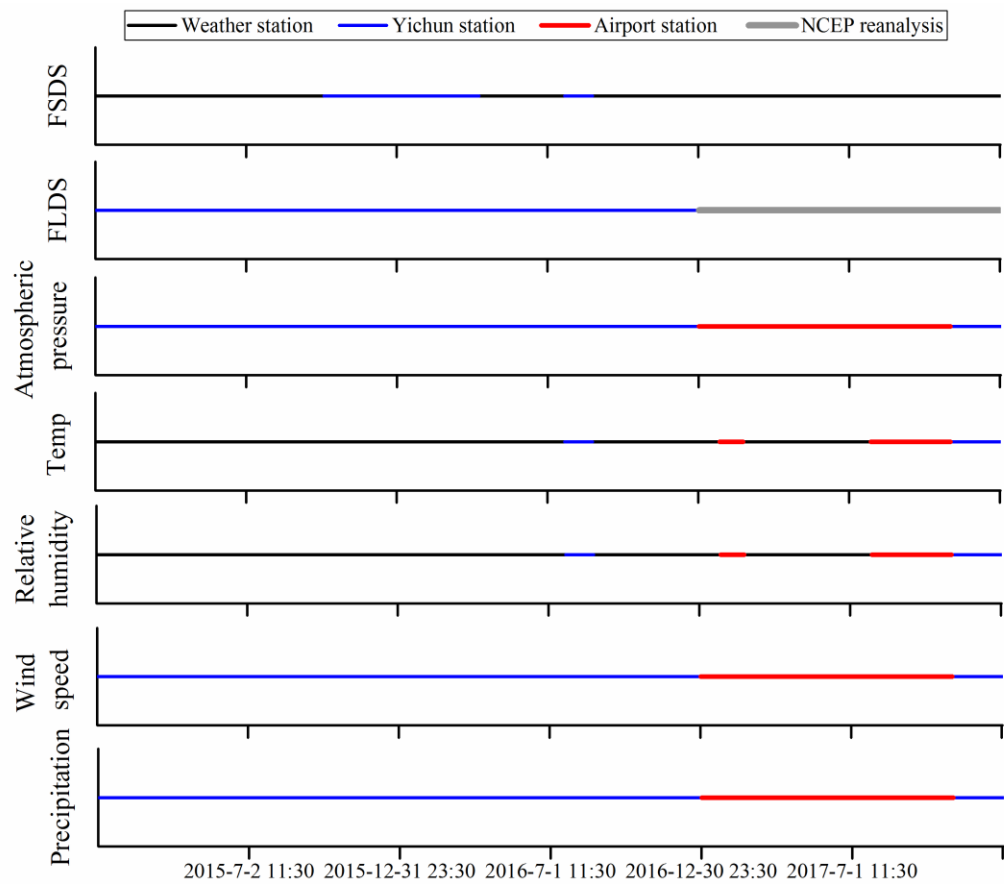

**Figure S1.** Data availability for the modeling study. FSDS, incident solar radiation; FLDS, incident longwave radiation; Temp, surface air temperature.

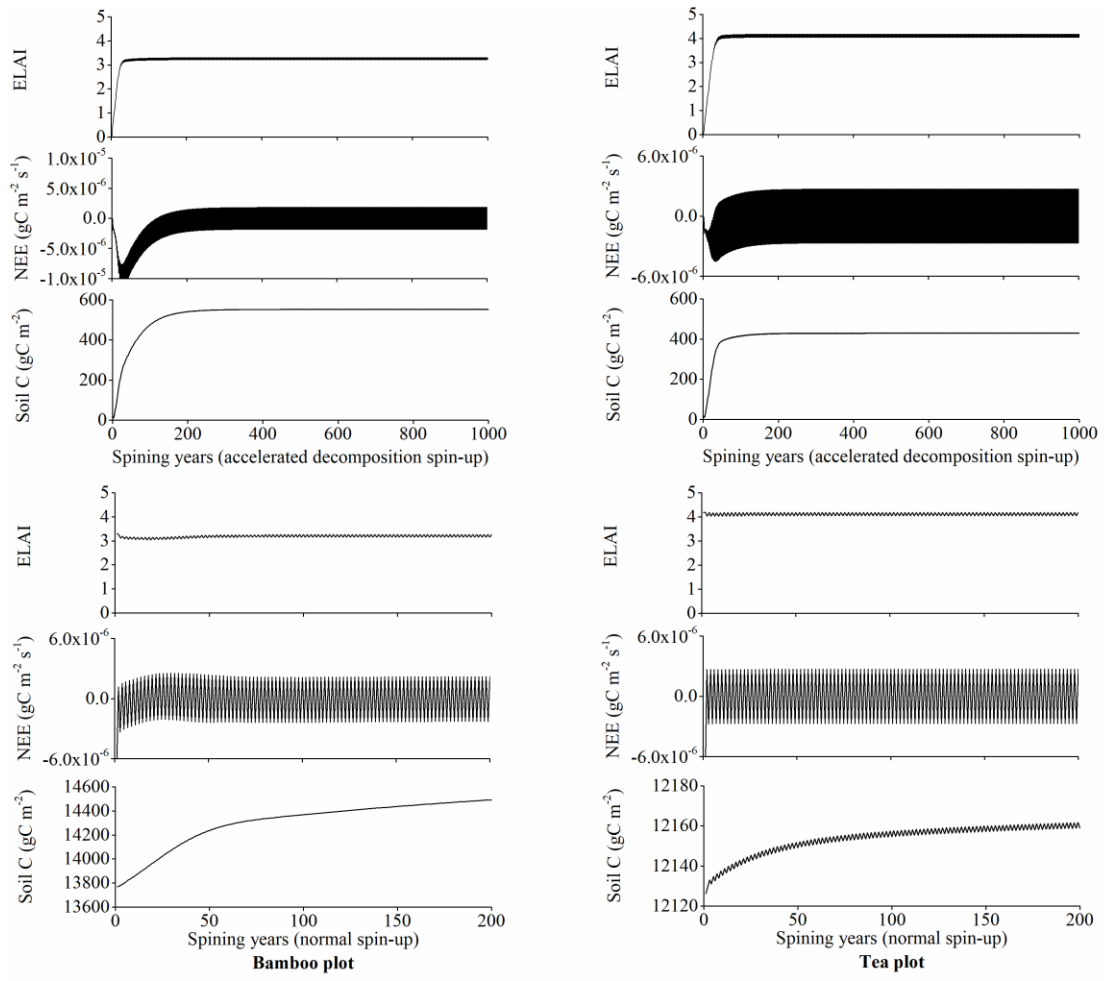

**Figure S2.** Accelerated decomposition spinup and final spinup results for bamboo and tea plots.

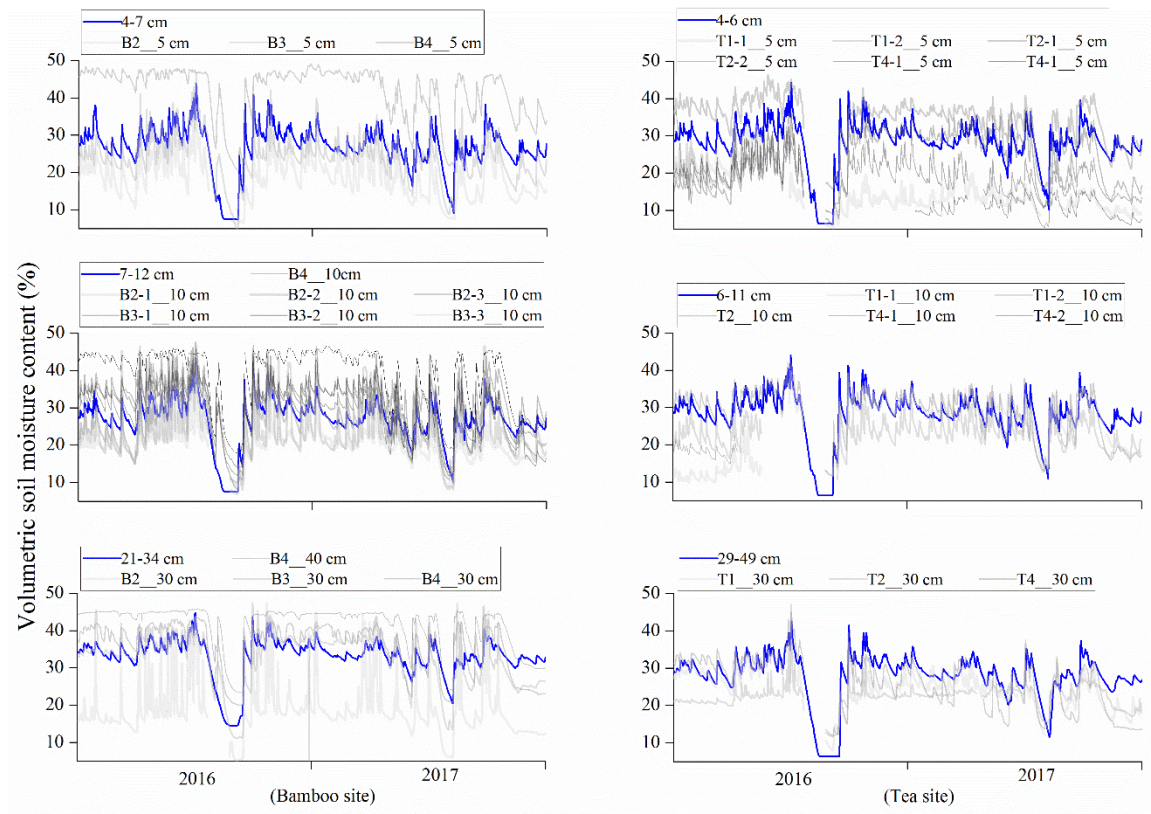

**Figure S3.** Observed and modeled daily soil water content at different depths at bamboo and tea plots.

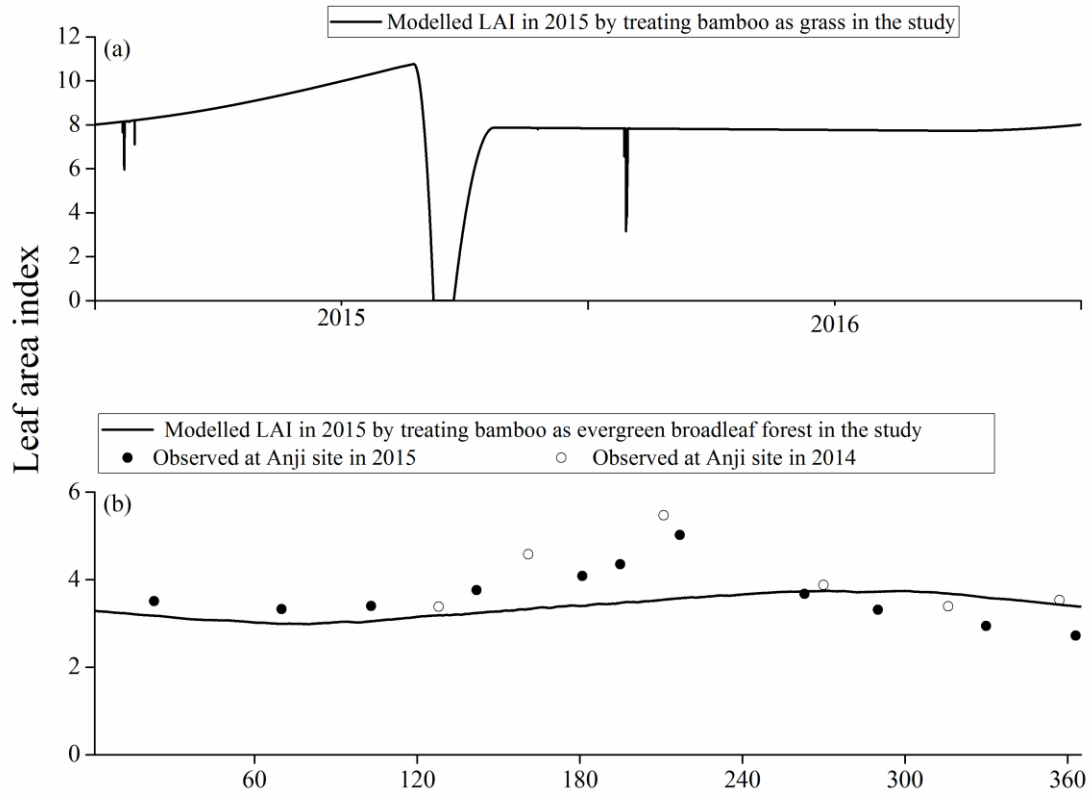

**Figure S4.** Observed (dots) and modeled (lines) leaf area index for Moso bamboo.

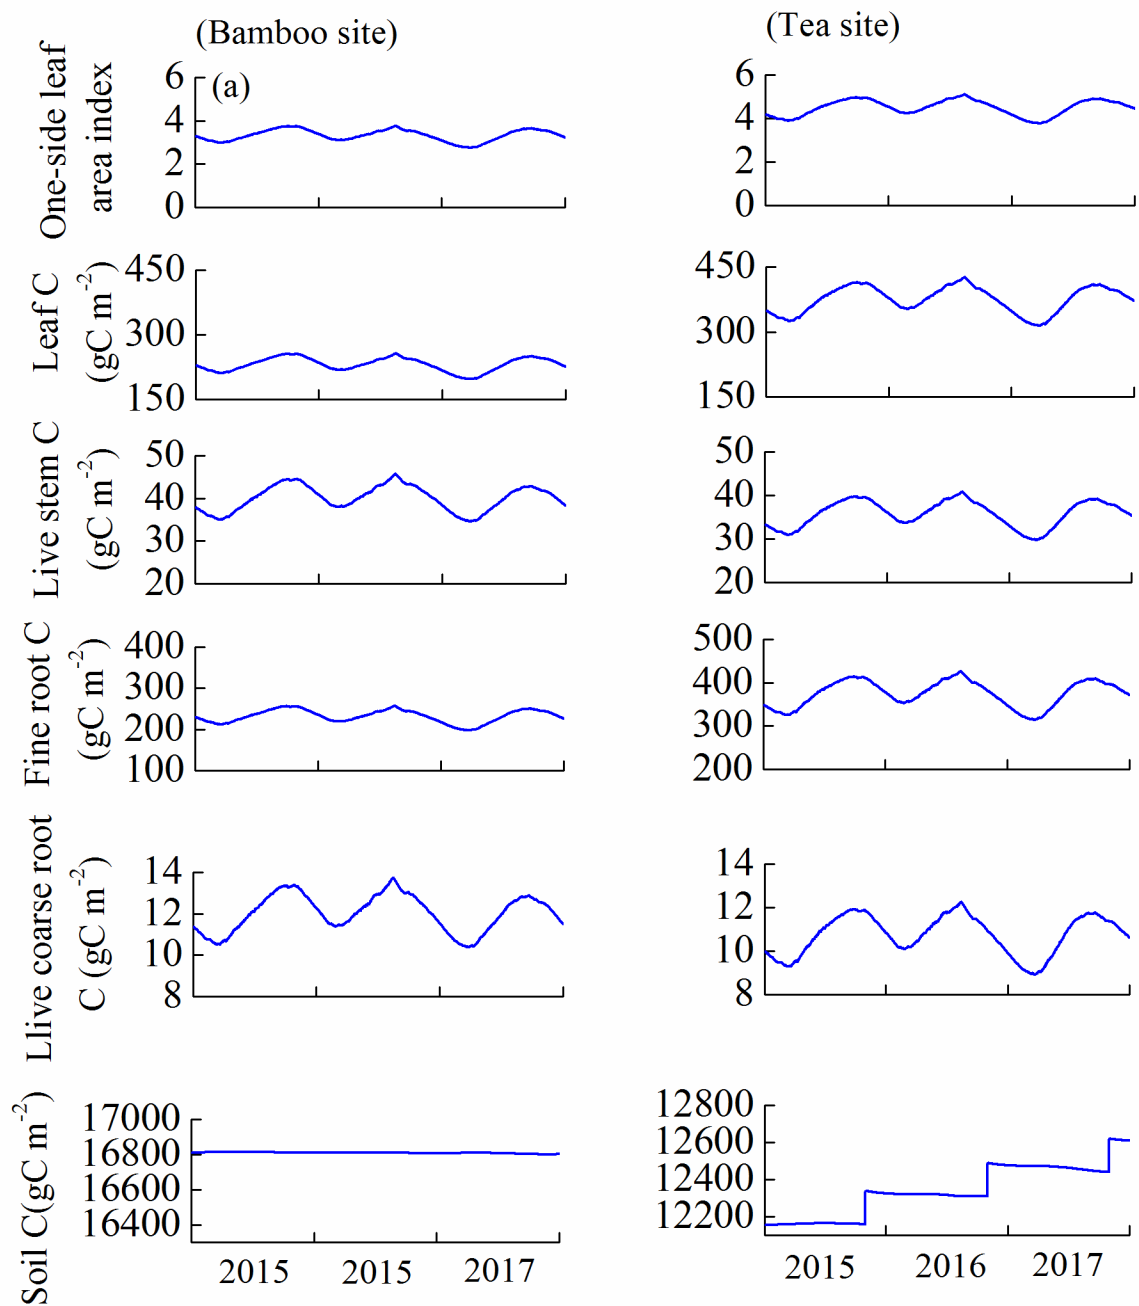

**Figure S5.** Modeled leaf area index and various carbon pools.

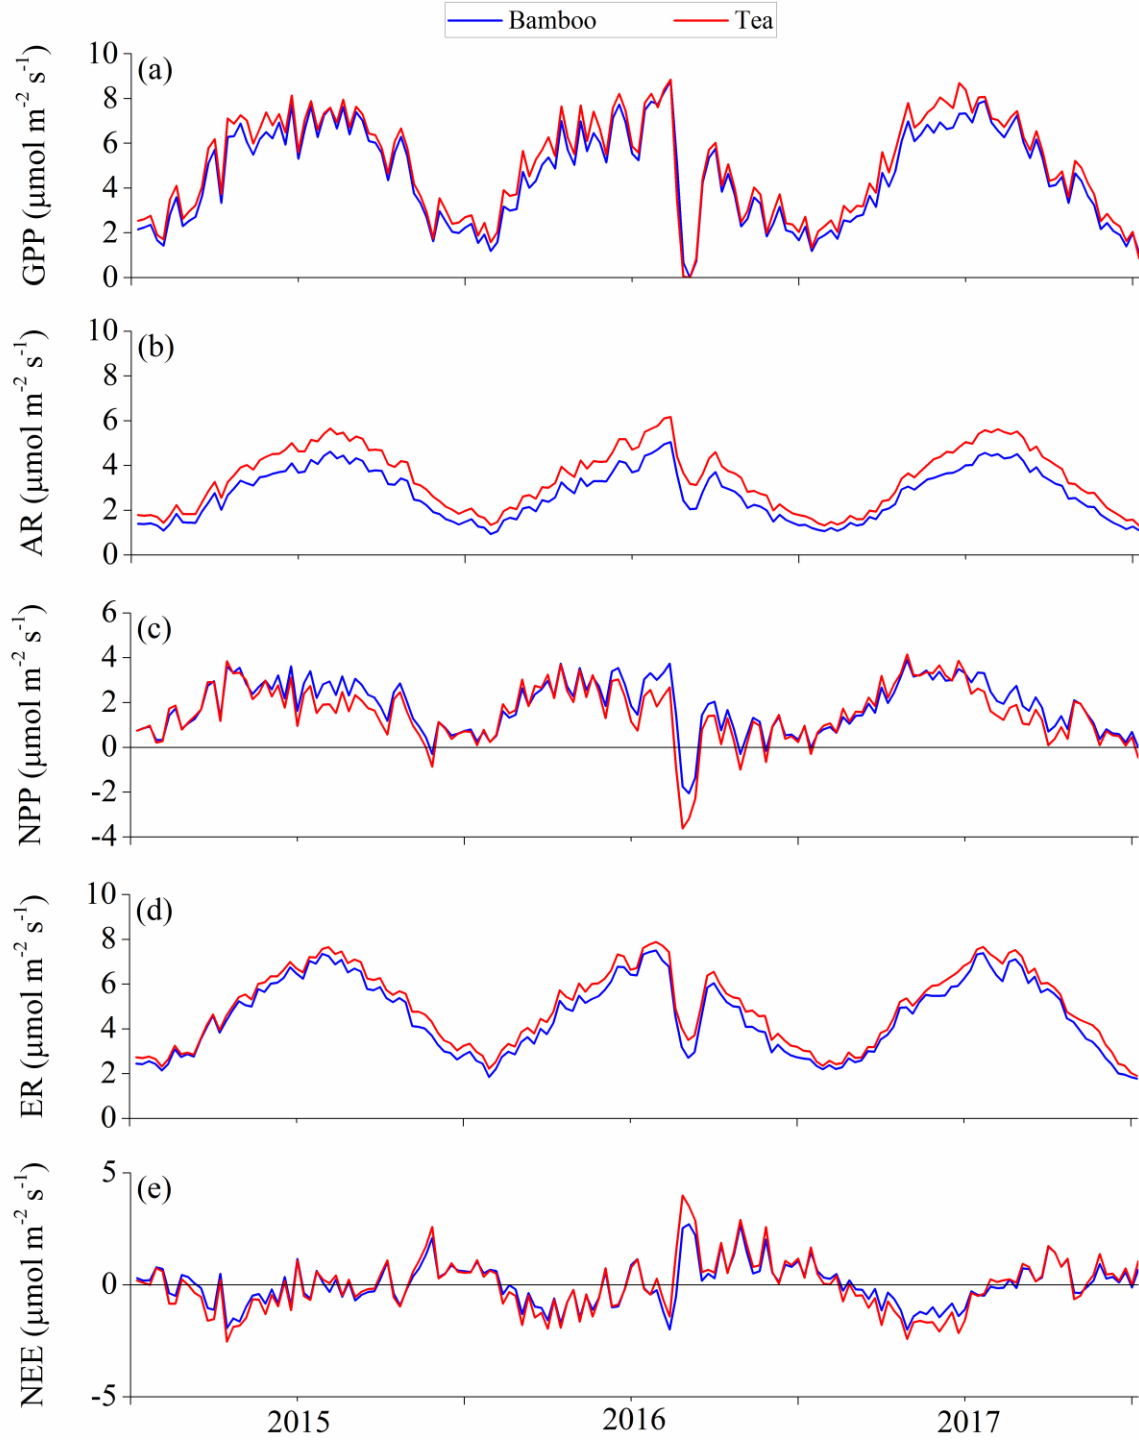

**Figure S6.** Modeled weekly carbon fluxes at the two study plots. AR, autotrophic respiration; ER, ecosystem respiration; GPP, gross primary production; NEE, net ecosystem exchange; NPP, net primary production.
